# Supplementary material for: Novel Compound Heterozygote Variations in FADD Identified to Cause FAS-Associated Protein with Death Domain Deficiency
Source: Springer Nature journal article supplement (doi:10.1007/s10875-020-00779-6), 2020-04-29
Supplement: MOESM1 [file 17941266]

# Supplemental Table 1

| <b>Test</b>          | <b>Patient Value</b> | <b>Reference Range</b> |
|----------------------|----------------------|------------------------|
| HHV6 IgG             | <i>Positive</i>      | Negative               |
| CMV IgG              | Negative             | Negative               |
| CMV PCR              | Negative             | Negative               |
| EBV-EA IgG           | Negative             | Negative               |
| EBV VCA IgG          | Negative             | Negative               |
| EBV VCA IgM/EBNA IgG | Negative             | Negative               |
| EBV PCR              | Negative             | Negative               |
| Parvovirus B19 IgM   | Negative             | Negative               |
| Parvovirus B19 IgG   | Negative             | Negative               |

## Supplemental Table 2

| <b>Test</b>       | <b>Patient Value</b> | <b>Reference Range</b>                  |
|-------------------|----------------------|-----------------------------------------|
| Hemoglobin        | 12                   | 11.5-15.5 (g/dL)                        |
| Hematocrit        | 37.2                 | 35-45 %                                 |
| Platelets         | 321                  | 143-398 ( $\times 10^3$ $\mu\text{L}$ ) |
| WBC               | 18.5                 | 5-14.5 ( $\times 10^3$ $\mu\text{L}$ )  |
| ANC               | 4,600                | 1.5-8 ( $\times 10^3$ $\mu\text{L}$ )   |
| Total Lymphocytes | 8,740 ( <i>H</i> )   | 1.5-7( $\times 10^3$ $\mu\text{L}$ )    |
| CD3+ (T cells)    | 5,947 ( <i>H</i> )   | 603-2990/cmm                            |
| CD16+CD56+ (NK)   | 207                  | 95-640/cmm                              |
| CD19+ (B cells)   | 2,186 ( <i>H</i> )   | 107-698/cmm                             |

## Supplemental Table 3

| <b>Test</b>                                 | <b>Patient Value<br/>Total, (%)</b> | <b>Reference Range<br/>Total, (%)</b> |
|---------------------------------------------|-------------------------------------|---------------------------------------|
| Total B cells CD19+                         | 2,014 (27%)                         | 107-698/cmm (7-27%)                   |
| Memory B<br>(CD19+CD27+)                    | 137 (6.8%)                          | 18-145/cmm (6-53%)                    |
| IgM Memory B cells<br>(CD19+CD27+IgM+)      | 6 (0.3%)                            | 0-12/cmm (0-5%)                       |
| Unswitched Memory B<br>(CD19+CD27+IgM+IgD+) | 62 (3.1%)                           | 4-85/cmm (2-29%)                      |
| Switched Memory B<br>(CD19+CD27+IgM-IgD-)   | 56 (2.8%)                           | 7-61/cmm (2-27%)                      |
| Immature B cells<br>(CD19+CD21Low)          | 107 (5.3%)                          | 0.3-22/cmm (0.2-9%)                   |

# Supplemental Table 4

| Test                                                   | Patient Value | Reference Range    |
|--------------------------------------------------------|---------------|--------------------|
| T-Lymph (CD3+)                                         | 5,271 (70%)   | 603-2,990 (49-84%) |
| T-Helper (CD4+)                                        | 2,748 (36%)   | 441-2,156 (28-63%) |
| T Cytotoxic (CD8+)                                     | 2,065 (27%)   | 125-1,312 (10-40%) |
| Ratio (CD4:CD8)                                        | 1.33          | 0.96-3.93          |
| CD4 Naïve (CD4+CD45RA+)                                | 1,374 (50%)   | 84-563 (22-53%)    |
| CD Memory (CD4+ CD45RO+)                               | 1,209 (44%)   | 204-696 (34-74%)   |
| CD4 CD62L Naïve (CD4+CD45RA+CD62L+)                    | 1,347 (49%)   | 72-717 (26-64%)    |
| CD4 Effector Memory (CD4+CD45RA-CD62L-)                | 550 (20%)     | 34-244 (9-24%)     |
| CD4 Central Memory (CD4+CD45RA-CD62L+)                 | 769 (28%)     | 138-484 (22-53%)   |
| CD4 TEMRA (CD4+CD45RA+CD62L-)                          | 82 (3%)       | 0-39 (0-4%)        |
| CD8 Naïve (CD8+CD45RA+)                                | 1,693 (82%)   | 74-530 (42-73%)    |
| CD8 Memory (CD8+CD45RO+)                               | 330 (16%)     | 53-258 (14-47%)    |
| CD8 CD62L Naïve (CD8+CD45RA+CD62L+)                    | 1,466 (71%)   | 23-474 (22-71%)    |
| CD8 Effector Memory (CD8+CD45RA-CD62L-)                | 289 (14%)     | 26-172 (8-32%)     |
| CD8 Central Memory (CD8+CD45RA-CD62L+)                 | 83 (4%)       | 6-11 (2-21%)       |
| CD8 TEMRA (CD8+CD45RA+CD62L-)                          | 248 (12%)     | 0-233 (0-43%)      |
| TCR $\alpha\beta$ +                                    | 5597 (64%)    | 1253-2216 (59-81%) |
| TCR $\alpha\beta$ + CD4-CD8- (Double Negative T cells) | 411 (4.7%)    | 11-37 (0.3-1.7%)   |
| HLADR+ activated                                       | 833 (14%)     | 51-246 (3-25%)     |
| CD3+CD25+/HLA DR                                       | 1.6           | 1.1-10.6           |

# Supplemental Table 5

| Test                              | Patient Value (mg/dL) | Reference Range (mg/dL) Based on Caliper, Age specific |
|-----------------------------------|-----------------------|--------------------------------------------------------|
| IgG                               | 1,068                 | 504-1464                                               |
| IgA                               | 204                   | 50-240                                                 |
| IgM                               | 27                    | 40-140                                                 |
| Isohemagglutinins (Blood type A+) |                       |                                                        |
| A1                                | <1:2                  |                                                        |
| A2                                | <1:2                  |                                                        |
| B                                 | <1:2                  |                                                        |
| Vaccine titers                    |                       |                                                        |
| Tetanus                           | 0.5                   | >0.1 protective                                        |
| S. pneumoniae                     | 0/23                  | 17/23 protective                                       |
| H. Influenzae B                   | 4.0                   | >1.0 protective                                        |

| Test | Patient Value | Reference Range  |
|------|---------------|------------------|
| CH50 | 111           | 60-144 CAE Units |
| AH50 | 94% of normal | >46              |

| Lymphocyte Proliferation        |          |          |          |          |         |
|---------------------------------|----------|----------|----------|----------|---------|
| Patient Value [Reference Range] |          |          |          |          |         |
|                                 | Lymphs   | CD3      | CD4      | CD8      | CD19    |
| PHA                             | 85 [>33] | 89 [>41] | 82 [>28] | 96 [>58] |         |
| Concanavalin A                  | 65 [>29] | 71 [>35] | 78 [>34] | 62 [>34] |         |
| Pokeweed                        | 28 [>10] | 35 [>2]  | 21 [>1]  | 47 [>5]  | 2 [>11] |
| Tetanus                         | 0 [>2]   | 0 [>1]   | 0 [>2]   |          |         |
| Candida                         | 64 [>4]  | 60 [>2]  |          |          |         |

| Test                         | Patient Value | Reference Range |
|------------------------------|---------------|-----------------|
| Cytotoxic T Lymphocyte assay | Normal        | Normal          |

# Supplemental Table 6

| Test        | Patient Value | Reference Range |
|-------------|---------------|-----------------|
| Vitamin B12 | 1415 pg/ml    | 254-1060 pg/ml  |

| Test                      | Patient Value        |
|---------------------------|----------------------|
| Peripheral smear findings | +Howell Jolly bodies |
| ANA                       | Negative             |

| Test         | Patient Value (pg/ml) | Reference Range (pg/ml) |
|--------------|-----------------------|-------------------------|
| IL1 $\beta$  | 5                     | $\leq 25$               |
| IL2          | 3                     | $\leq 3$                |
| IL4          | 5                     | $\leq 8$                |
| IL6          | 3                     | $\leq 6$                |
| IL10         | 9                     | $\leq 6$                |
| IL18         | 591                   | 89-540                  |
| IFNg         | 1                     | $\leq 5$                |
| TNF $\alpha$ | 1                     | $\leq 7$                |

# Supplemental Table 7

|                    | II.1<br>M/WT | II.2<br>WT/del | III.1<br>WT/del | III.3<br>M/WT | III.4<br>WT/del | III.5<br>M/Del<br>(Proband) | III.6<br>M/WT | Reference<br>Range |
|--------------------|--------------|----------------|-----------------|---------------|-----------------|-----------------------------|---------------|--------------------|
| Apoptosis          | 77%          | 72%            | 44% (L)         | 74%           | 56% (L)         | 2% (L)                      | 58% (L)       | 68-93%             |
| Serum FasL (pg/ml) | 147          | 129            | 274 (H)         | 184           | 233 (H)         |                             |               | 37-226             |
|                    |              |                |                 |               |                 | 758 (H)                     | 271           | 70-308             |

Supplemental Table 7: Fas-mediated apoptosis and serum FasL levels.

# Supplemental Table 8

| ALPs Testing                                 | II.1 (M/WT)   |                   | II.2 (WT/del) |                   | III.5 (M/del)<br>(Proband) |                   | Reference           |                             |
|----------------------------------------------|---------------|-------------------|---------------|-------------------|----------------------------|-------------------|---------------------|-----------------------------|
|                                              | Patient Value | Positive/Negative | Patient Value | Positive/Negative | Patient Value              | Positive/Negative | Reference Range     | Criteria                    |
| TCRαβ+ CD4-CD8-<br>(Double Negative T cells) | NR (1.3%)     | Negative          | 16 (0.8%)     | Negative          | 411 (4.7%)                 | Positive          | 11-37<br>(0.3-1.7%) | >2% or<br>>68 cells/<br>mcl |
| B220 TCR a/b DNTCs >60%                      | 22%           | Negative          | 16%           | Negative          | 61%                        | Positive          | 5-25%               | >60%                        |
| CD3+CD25+/HLA DR Ratio                       | 3.4           | Negative          | 4.7           | Negative          | 1.6                        | Negative          | 1.1-10.6            | <1.0                        |
| CD27+ B cells <15%                           | 68%           | Negative          | 24%           | Negative          | 6%                         | Positive          | 11-51%              | <15%                        |
| Total Score                                  | 0/4           |                   | 0/4           |                   | 3/4                        |                   |                     |                             |

| Lymphocyte Proliferation | II.1 (M/WT)   | II.2 (WT/del) | Reference       |
|--------------------------|---------------|---------------|-----------------|
|                          | Patient Value | Patient Value | Reference Range |
| PHA                      | 236,195       | 258,199       | ≥135,000        |
| Tetanus                  | 8,273         | 1,753         | ≥4,761          |
| Candida                  | 246,973       | 96,263        | ≥15,289         |

Supplemental Table 8: ALPs testing and lymphocyte proliferation assays. NR (Not reportable) - Absolute values for II.1 not available due to lack of simultaneous CBC with differential. Testing performed by Cincinnati Children’s Hospital Medical Center Cancer and Blood Diseases Institute – Diagnostic Immunology Laboratory
